# Supplementary material for: What insights do patients and caregivers have on acute kidney injury and posthospitalisation care? A single-centre qualitative study from Toronto, Canada
Source: PubMed Central journal article supplement — BMJ Open. 2018 Jun 15;8(6):e021418. doi: 10.1136/bmjopen-2017-021418 (PMC6009618; doi:10.1136/bmjopen-2017-021418), 2018-06-15
Supplement: bmjopen-2017-021418supp001.pdf [file bmjopen-2017-021418supp001.pdf]

## Online Supplement

**Figure 1:** Guide for patient interviews

**Figure 2:** Guide for caregiver interviews

## **Figure 1: Guide for Patient Interviews**

### **Preamble**

- Use shortly after hospital discharge
- Goal is to determine patient knowledge/understanding of acute kidney injury and its long-term consequences
- The following questions and/or prompts have been developed by the investigative team to guide this discussion

### **Introduction**

Remind the participant of the following:

- The interview is voluntary and consent is implied by participating in the interview
- The expected length is 30-60 minutes
- The session will be audio recorded for accuracy
- Participants may skip any question that they do not wish to answer
- Participants may pause or stop the interview at any time, for any reason

### **Demographic Information**

- Age
- Gender

### **General Health Questions**

- Tell me about your health?
- What is your understanding of your current discharge plan?
- What are your main concerns right now?

### **Questions Related to Acute Kidney Injury Hospitalization**

- What were you admitted to hospital for?
- When you think of your recent hospital stay, what is the first thing you think of?
- What organs in your body were affected?
- Were your kidneys affected during this hospital admission? If so, how and why?
- How are your kidneys functioning now?

### **Acute Kidney Injury**

- When you hear the term acute kidney injury or acute renal failure, what comes to mind?
- How do you know if your kidneys are working properly?
- Do you think of acute kidney injury the same way as a disease such as diabetes or heart attack? Please explain.
- If asked about your past medical history, would you list acute kidney injury? Explain.

### **Questions Related to Long-term Health**

- Has this current admission affected your long-term kidney health? If so, what steps will you take so your kidneys improve?
- What are your main concerns when you leave hospital?
- What are your health priorities when you leave hospital?

- Whose responsibility is it to arrange follow-up care after a hospital stay? The inpatient team? Family doctor? Patient?

### **Closing**

- Now that you have thought through all of these details about your hospital stay and your kidneys, can you describe your understanding of acute kidney injury and how it impacts you? In the short-term? In the long-term?
- Is there anything else related to this hospital admission and your kidneys that we have not covered?

## **Figure 2: Guide for Caregiver Interviews**

### **Preamble**

- Use shortly after hospital discharge
- Goal is to determine family knowledge/understanding of acute kidney injury and its long-term consequences
- The following questions and/or prompts have been developed by the investigative team to guide this discussion

### **Introduction**

Remind the participant of the following:

- The interview is voluntary and consent is implied by participating in the interview
- The expected length is 30-60 minutes
- The session will be audio recorded for accuracy
- Participants may skip any question that they do not wish to answer
- Participants may pause or stop the interview at any time, for any reason

### **Demographic Information**

- Age
- Gender
- Relationship with patient

### **General Health Questions**

- Tell me about your family member's health?
- What is your understanding of their current discharge plan?
- What are your main concerns right now?

### **Questions Related to Acute Kidney Injury Hospitalization**

- What was your family member admitted to hospital for?
- When you think of their recent hospital stay, what is the first thing you think of?
- What organs in their body were affected?
- Were their kidneys affected during this hospital admission? If so, how and why?
- How are their kidneys functioning now?

### **Acute Kidney Injury**

- When you hear the term acute kidney injury or acute renal failure, what comes to mind?
- How do you know if your kidneys are working properly?
- Do you think of acute kidney injury the same way as a disease such as diabetes or heart attack? Please explain.
- If asked about your family member's past medical history, would you list acute kidney injury? Explain.

### **Questions Related to Long-term Health**

- Has this current admission affected your family member's long-term kidney health? If so, what steps will you take to help their kidneys improve?

- What are your main concerns for your family member when they leave hospital?
- What are your family member's health priorities when they leave hospital?
- Whose responsibility is it to arrange follow-up care after a hospital stay? The inpatient team? Family doctor? Patient?

### **Closing**

- Now that you have thought through all of these details about your family member's hospital stay and their kidneys, can you describe your understanding of acute kidney injury and how it impacts patients? In the short-term? In the long-term?
- Is there anything else related to this hospital admission and your family member's kidneys that we have not covered?
